# Supplementary material for: Colorimetric recognition of DNA intercalators with unmodified gold nanoparticles
Source: Royal Society of Chemistry journal article supplement (doi:10.1039/b815825h), 2009-01-01
Supplement: b815825h.pdf [file b815825h.pdf]

## Colorimetric recognition of DNA intercalator with unmodified gold nanoparticles

Aiping Xin, Qiupeng Dong, Cen Xiong, Liansheng Ling\*

State Key Laboratory of Optoelectronic Materials and Technologies, School of Chemistry and Chemical Engineering, Sun Yat-sen University, Guangzhou 510275, P.R.China

### Experimental Section

**Materials.** All oligodeoxyribonucleotides were purchased from Beijing SBS Genetech Co., Ltd. (Beijing, China).  $\text{HAuCl}_4 \cdot 3\text{H}_2\text{O}$  was purchased from Aldrich Co.. Trisodium citrate, sodium chloride, sodium acetate and sodium phosphate monobasic dehydrate were purchased from tianjin fuchen chemistry reagent factory.  $\text{Ru}(\text{phen})_3\text{Cl}_2$  and Ethidium bromide was purchased from aldrich-sigma Co.,  $\text{Ru}(\text{bipy})_2(\text{dppz})(\text{BF}_4)_2 \cdot 1.5\text{H}_2\text{O}$ ,  $\text{Ru}(\text{phen})_2(\text{dppz})(\text{BF}_4)_2 \cdot 3.5\text{H}_2\text{O}$  and  $\text{Ru}(\text{bipy})_2(\text{dppx})(\text{BF}_4)_2 \cdot 2\text{H}_2\text{O}$  was home made. The store solution of  $1.0 \times 10^{-4} \text{M}$   $\text{Ru}(\text{phen})_3^{2+}$  was prepared by dissolving 7.1mg  $\text{Ru}(\text{phen})_3\text{Cl}_2$  in 100ml water;  $1.0 \times 10^{-4} \text{M}$  Ethidium bromide was prepared by dissolving 4.0mg Ethidium bromide in 100ml water;  $1.0 \times 10^{-4} \text{M}$   $\text{Ru}(\text{bipy})_2(\text{dppz})^{2+}$  was prepared by dissolving 9.0mg  $\text{Ru}(\text{bipy})_2(\text{dppz})(\text{BF}_4)_2 \cdot 1.5\text{H}_2\text{O}$  in 100ml water;  $1.0 \times 10^{-4} \text{M}$   $\text{Ru}(\text{phen})_2(\text{dppz})^{2+}$  was prepared by dissolving 9.1mg  $\text{Ru}(\text{phen})_2(\text{dppz})(\text{BF}_4)_2 \cdot 3.5\text{H}_2\text{O}$  in 100ml water;  $1.0 \times 10^{-4} \text{M}$   $\text{Ru}(\text{bipy})_2(\text{dppx})^{2+}$  was prepared by dissolving 9.3mg  $\text{Ru}(\text{bipy})_2(\text{dppx})(\text{BF}_4)_2 \cdot 2\text{H}_2\text{O}$  in 100ml water.

Ultraviolet-visible absorption spectra were recorded on TU 1901UV-visible absorption spectrometer (Beijing Pukinje General Instrument Co., Ltd) using 1 cm path length quartz cells. Nano-pure water (18.1 M $\Omega$ ) that obtained from a 350 Nano-pure water system (Guangzhou Crystalline Resource Desalination of Sea Water and Treatment Co., Ltd.) was used in all experiments.

### Preparation of Au nanoparticles

Au nanoparticles were prepared with the method of reduction of  $\text{HAuCl}_4$  with citrate [Grabar, K.C., Freeman, R.G., Hommer, M.B., Natan, M. J. Anal. Chem. 1995, 67, 735-743.]. The average particle size was about 13 nm in diameter by TEM.

### Procedure

300  $\mu\text{L}$  gold colloid was diluted with 300ul water, then was mixed with 150ul 1350pmol

oligo-a (or oligo-b), then those intercalative (or non- intercalative ) molecule were added into separately, and then with 300  $\mu\text{L}$  of 10 mM PBS containing 0.35 M NaCl was added.

#### Measurement of melting temperature

The melting curve of oligo-a with and without  $\text{Ru}(\text{phen})_3^{2+}$  was obtained with TU 1901UV-visible absorption spectrometer (Beijing Pukinje General Instrument Co.,Ltd) using 1 cm path length quartz cells. The melting curve of oligo-a in the presence of EB,  $\text{Ru}(\text{bipy})_2\text{dppz}^{2+}$ ,  $\text{Ru}(\text{phen})_2\text{dppz}^{2+}$  or  $\text{Ru}(\text{bipy})_2\text{dppx}^{2+}$  was recorded with RF-5301(Shimadazu, Japan) spectrofluorometer with a quartz cell (1 $\times$ 1 cm cross-section).

S-Table 1 melting temperature of oligo-a in the presence of different ligand

| DNA binder                                 | T <sub>m</sub> (°C) |
|--------------------------------------------|---------------------|
| Oligo-a (no binder)                        | 25                  |
| $\text{Ru}(\text{phen})_3^{2+}$            | 26                  |
| EB                                         | 33                  |
| $\text{Ru}(\text{bipy})_2\text{dppz}^{2+}$ | 44                  |
| $\text{Ru}(\text{phen})_2\text{dppz}^{2+}$ | 44                  |
| $\text{Ru}(\text{bipy})_2\text{dppx}^{2+}$ | 42                  |

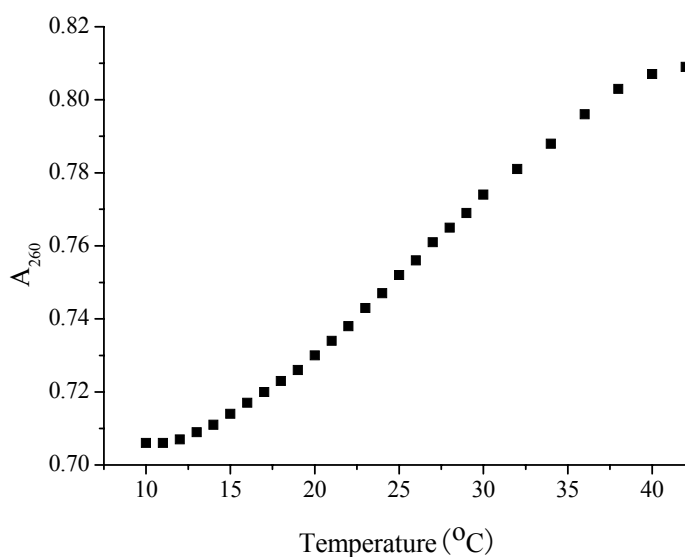

S-Figure-1 Melting curve of oligo-a(Oligo-a: 7.0 $\mu\text{M}$ , NaCl: 0.10M)

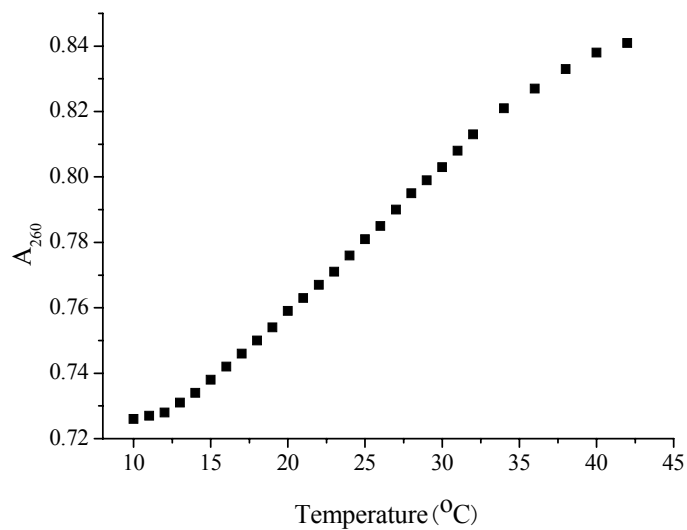

S-Figure-2 Melting curve of oligo-a in the presence of Ru(phen)<sub>3</sub><sup>2+</sup> (Oligo-a: 7.0μM, NaCl: 0.10M, Ru(phen)<sub>3</sub><sup>2+</sup>:5.0μM)

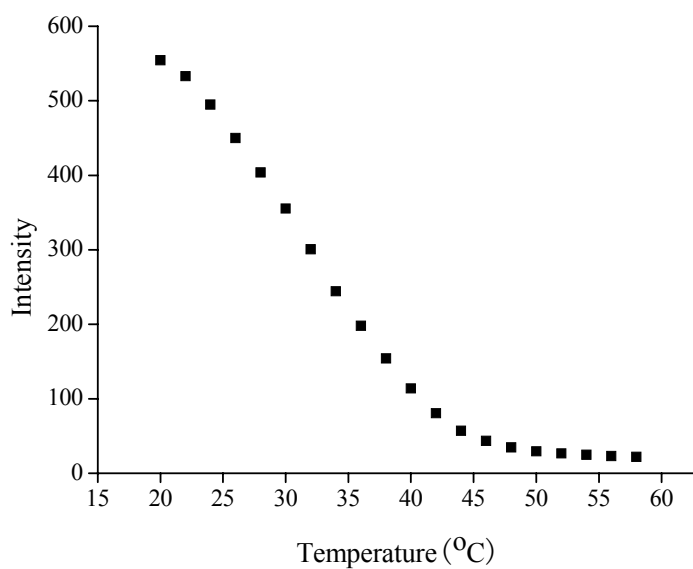

S-Figure-3 Melting curve of oligo-a in the presence of EB (EB:3.3μM, NaCl:0.1M, oligo-a:4.0μM, λ<sub>ex</sub>:542nm λ<sub>em</sub>:602nm), slit width(EX:3.0nm, EM:5.0nm)

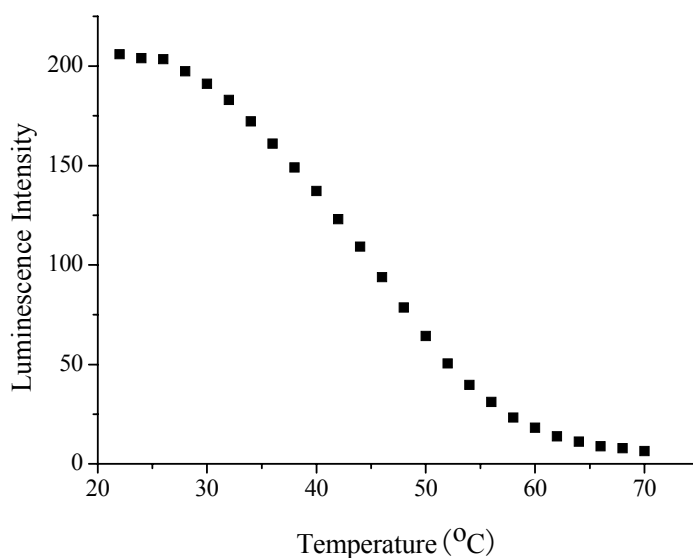

S-Figure-4 Melting curve of oligo-a in the presence of Ru(bipy)<sub>2</sub>dppz<sup>2+</sup> (Ru(bipy)<sub>2</sub>dppz<sup>2+</sup>:3.3μM, NaCl:0.1M, oligo-a:1.3μM, λ<sub>ex</sub>:455nm, λ<sub>em</sub>:630nm), slit width(EX:5.0nm, EM:10.0nm)

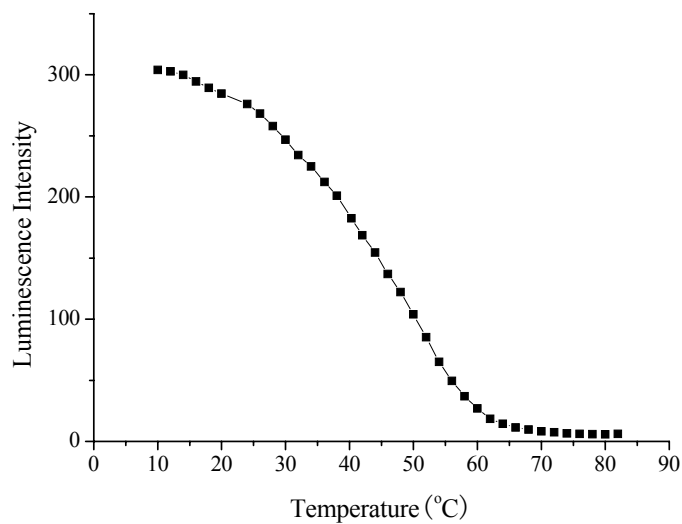

S-Figure-5 Melting curve of oligo-a in the presence of Ru(phen)<sub>2</sub>dppz<sup>2+</sup> (Ru(phen)<sub>2</sub>dppz<sup>2+</sup>:3.3μM, NaCl:0.1M, oligo-a:4.0μM, λ<sub>ex</sub>:449nm, λ<sub>em</sub>:617nm), slit width (EX: 5.0nm, EM: 10.0nm)

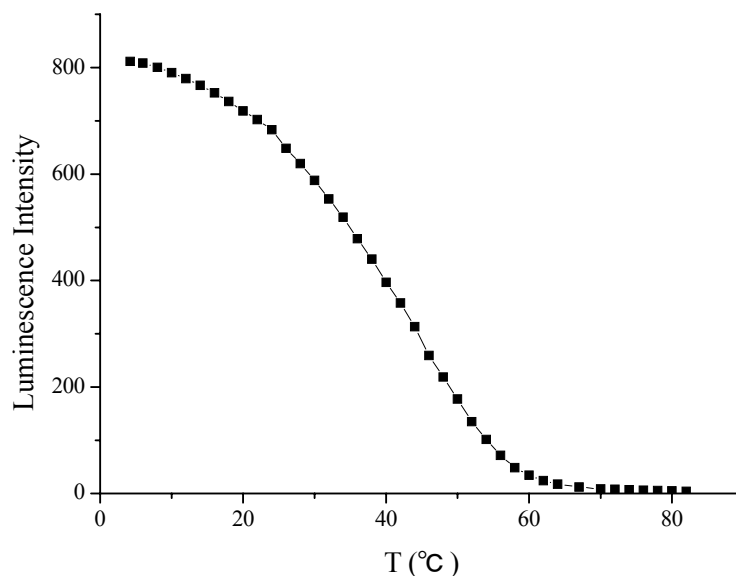

S-Figure-6 Melting curve of oligo-a in the presence of Ru(bipy)<sub>2</sub>dppx<sup>2+</sup> (Ru(bipy)<sub>2</sub>dppx<sup>2+</sup>:3.3μM, NaCl:0.1M, oligo-a:4.0μM, λ<sub>ex</sub>:460nm, λ<sub>em</sub>:613nm), slit width(EX:5.0nm, EM:10.0nm)

1. Ru(phen)<sub>3</sub><sup>2+</sup>:

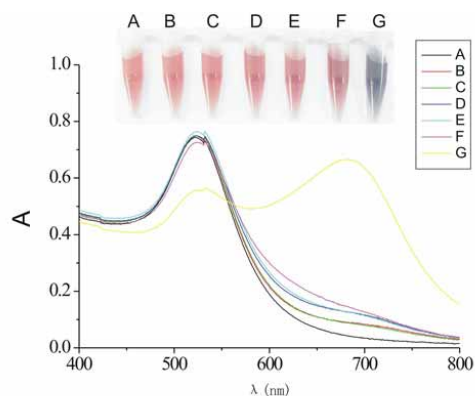

S-Figure-7 Effect of Ru(phen)<sub>3</sub><sup>2+</sup> on the naked gold nanoparticles.

- A. 3.0nM gold nanoparticles    B. A+0.05μM Ru(phen)<sub>3</sub><sup>2+</sup>  
C. A+0.10μM Ru(phen)<sub>3</sub><sup>2+</sup>;    D. A+0.16μM Ru(phen)<sub>3</sub><sup>2+</sup>  
E. A+0.21μM Ru(phen)<sub>3</sub><sup>2+</sup>    F. A+ 0.26μM Ru(phen)<sub>3</sub><sup>2+</sup>  
G. A+0.31μM Ru(phen)<sub>3</sub><sup>2+</sup>

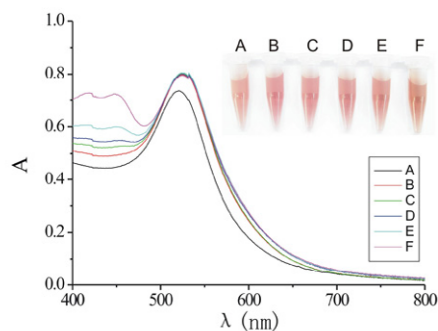

S-Figure-8 Effect of  $\text{Ru(phen)}_3^{2+}$  on the oligo-b adsorbed gold nanoparticles.

- A. 3.0nM gold nanoparticles+1.13 $\mu\text{M}$  oligo-b;    B. A+2.08 $\mu\text{M}$   $\text{Ru(phen)}_3^{2+}$ ;  
C. A+4.00 $\mu\text{M}$   $\text{Ru(phen)}_3^{2+}$ ;                    D. A+5.21 $\mu\text{M}$   $\text{Ru(phen)}_3^{2+}$ ;  
E. A+8.33 $\mu\text{M}$   $\text{Ru(phen)}_3^{2+}$ ;                    F. A+16.67 $\mu\text{M}$   $\text{Ru(phen)}_3^{2+}$

2. EB

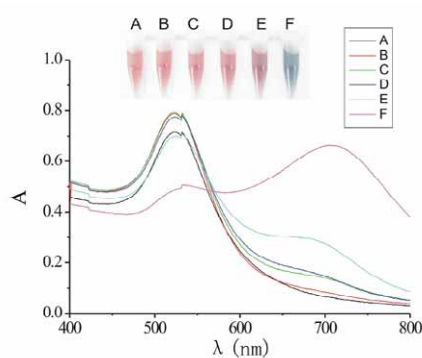

S-Figure-9 Effect of Ebon the naked gold nanoparticles

- A. 3.0 nM Au nanoparticles                    B. A+0.10  $\mu\text{M}$  EB  
C. A+0.21  $\mu\text{M}$  EB                                D. A+0.42  $\mu\text{M}$  EB  
E. A+0.63  $\mu\text{M}$  EB                                F. A+0.84  $\mu\text{M}$  EB

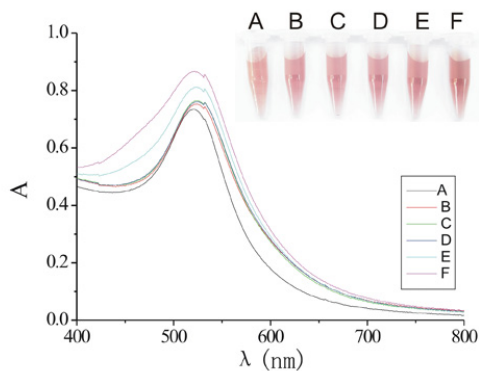

S-Figure-10 Effect of EB on the oligo-b adsorbed gold nanoparticles

- A. 3.0 nM Au nanoparticles+1.13  $\mu\text{M}$  oligo-b    B. A+1.04  $\mu\text{M}$  EB

C. A+2.08  $\mu\text{M}$  EB

D. A+4.00  $\mu\text{M}$  EB

E. A+16.67  $\mu\text{M}$  EB

F. A+33.33  $\mu\text{M}$

### 3. Ru(bipy)<sub>2</sub>dppz<sup>2+</sup>

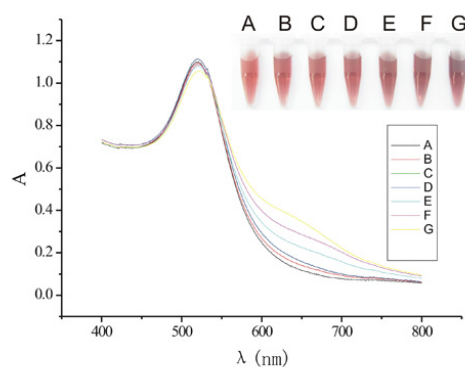

S-Figure-11 Effect of Ru(bipy)<sub>2</sub>dppz<sup>2+</sup> on the naked gold nanoparticles

A. 3.0 nM Au nanoparticles

B. A+0.03  $\mu\text{M}$  Ru(bipy)<sub>2</sub>dppz<sup>2+</sup>

C. A+0.06  $\mu\text{M}$  Ru(bipy)<sub>2</sub>dppz<sup>2+</sup>

D. A+0.09  $\mu\text{M}$  Ru(bipy)<sub>2</sub>dppz<sup>2+</sup>

E. A+0.13  $\mu\text{M}$  Ru(bipy)<sub>2</sub>dppz<sup>2+</sup>

F. A+0.16  $\mu\text{M}$  Ru(bipy)<sub>2</sub>dppz<sup>2+</sup>

G. A+0.21  $\mu\text{M}$  Ru(bipy)<sub>2</sub>dppz<sup>2+</sup>

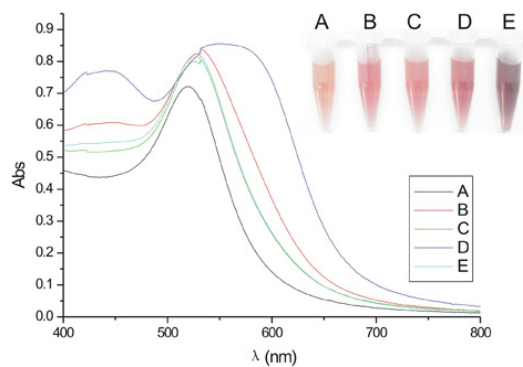

S-Figure-12 Effect of Ru(bipy)<sub>2</sub>dppz<sup>2+</sup> on the oligo-b adsorbed gold nanoparticles

A. 3.0 nM Au nanoparticles+1.13  $\mu\text{M}$  oligo-b

B. A+4.0  $\mu\text{M}$  Ru(bipy)<sub>2</sub>dppz<sup>2+</sup>

C. A+5.21  $\mu\text{M}$  Ru(bipy)<sub>2</sub>dppz<sup>2+</sup>

D. A+8.33  $\mu\text{M}$  Ru(bipy)<sub>2</sub>dppz<sup>2+</sup>

E. A+16.67  $\mu\text{M}$  Ru(bipy)<sub>2</sub>dppz<sup>2+</sup>

### 4. Ru(phen)<sub>2</sub>dppz<sup>2+</sup>:

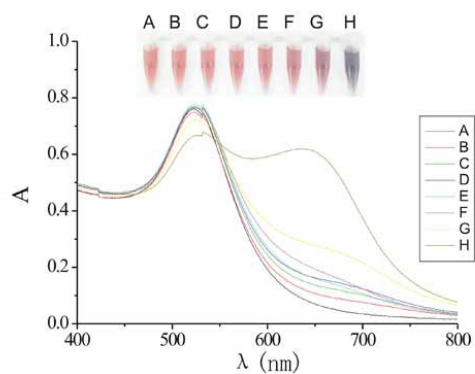

S-Figure-13 Effect of Ru(phen)<sub>2</sub>dppz<sup>2+</sup> on the naked gold nanoparticles

- A. 3.0 nM Au nanoparticles  
B. A+0.03 μM Ru(phen)<sub>2</sub>dppz<sup>2+</sup>  
C. A+0.06 μM Ru(phen)<sub>2</sub>dppz<sup>2+</sup>  
D. A+0.09 μM Ru(phen)<sub>2</sub>dppz<sup>2+</sup>  
E. A+0.13 μM Ru(phen)<sub>2</sub>dppz<sup>2+</sup>  
F. A+0.21 μM Ru(phen)<sub>2</sub>dppz<sup>2+</sup>  
G. A+0.27 μM Ru(phen)<sub>2</sub>dppz<sup>2+</sup>  
H. A+0.31 μM Ru(phen)<sub>2</sub>dppz<sup>2+</sup>

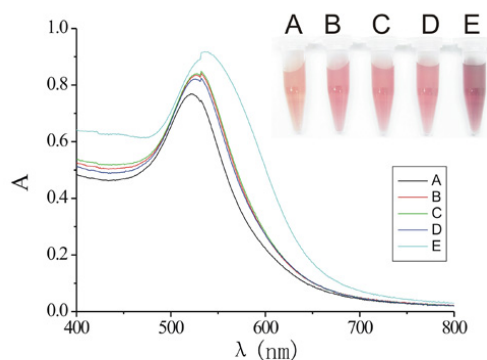

S-Figure-14 Effect of Ru(phen)<sub>2</sub>dppz<sup>2+</sup> on the oligo-b adsorbed gold nanoparticles

- A. 3.0 nM Au nanoparticles + 1.13 μM oligo-b  
B. A + 2.20 μM Ru(phen)<sub>2</sub>dppz<sup>2+</sup>  
C. A + 3.13 μM Ru(phen)<sub>2</sub>dppz<sup>2+</sup>  
D. A + 4.17 μM Ru(phen)<sub>2</sub>dppz<sup>2+</sup>  
E. A + 8.33 μM Ru(phen)<sub>2</sub>dppz<sup>2+</sup>  
5. Ru(bipy)<sub>2</sub>dppx<sup>2+</sup>:

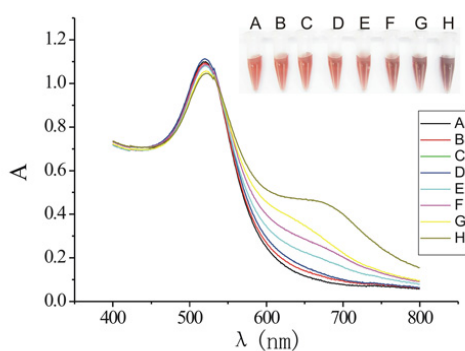

S-Figure -15 Effect of Ru(bipy)<sub>2</sub>dppx<sup>2+</sup> on the naked gold nanoparticles



- |                                                                   |                                                                   |
|-------------------------------------------------------------------|-------------------------------------------------------------------|
| A. 3.0 nM Au nanoparticles                                        | B. A+0.011 $\mu\text{M}$ Ru(bipy) <sub>2</sub> dppx <sup>2+</sup> |
| C. A+0.023 $\mu\text{M}$ Ru(bipy) <sub>2</sub> dppx <sup>2+</sup> | D. A+0.034 $\mu\text{M}$ Ru(bipy) <sub>2</sub> dppx <sup>2+</sup> |
| E. A+0.057 $\mu\text{M}$ Ru(bipy) <sub>2</sub> dppx <sup>2+</sup> | F. A+0.12 $\mu\text{M}$ Ru(bipy) <sub>2</sub> dppx <sup>2+</sup>  |
| G. A+0.17 $\mu\text{M}$ Ru(bipy) <sub>2</sub> dppx <sup>2+</sup>  | H. A+0.23 $\mu\text{M}$ Ru(bipy) <sub>2</sub> dppx <sup>2+</sup>  |

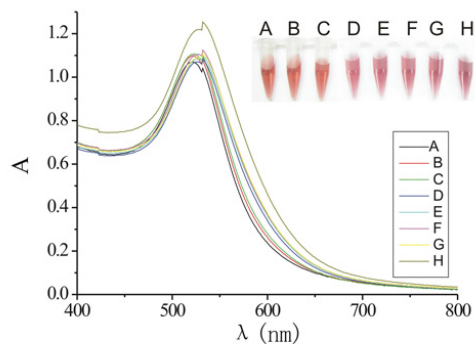

S-Figure-16 Effect of Ru(bipy)<sub>2</sub>dppx<sup>2+</sup> on the oligo-b adsorbed gold nanoparticles

- |                                                                  |                                                                  |
|------------------------------------------------------------------|------------------------------------------------------------------|
| A. 3.0 nM Au nanoparticles+1.13 $\mu\text{M}$ oligo-b            | B. A+0.17 $\mu\text{M}$ Ru(bipy) <sub>2</sub> dppx <sup>2+</sup> |
| C. A+0.33 $\mu\text{M}$ Ru(bipy) <sub>2</sub> dppx <sup>2+</sup> | D. A+2.08 $\mu\text{M}$ Ru(bipy) <sub>2</sub> dppx <sup>2+</sup> |
| E. A+2.40 $\mu\text{M}$ Ru(bipy) <sub>2</sub> dppx <sup>2+</sup> | F. A+2.50 $\mu\text{M}$ Ru(bipy) <sub>2</sub> dppx <sup>2+</sup> |
| G. A+2.71 $\mu\text{M}$ Ru(bipy) <sub>2</sub> dppx <sup>2+</sup> | H. A+3.13 $\mu\text{M}$ Ru(bipy) <sub>2</sub> dppx <sup>2+</sup> |

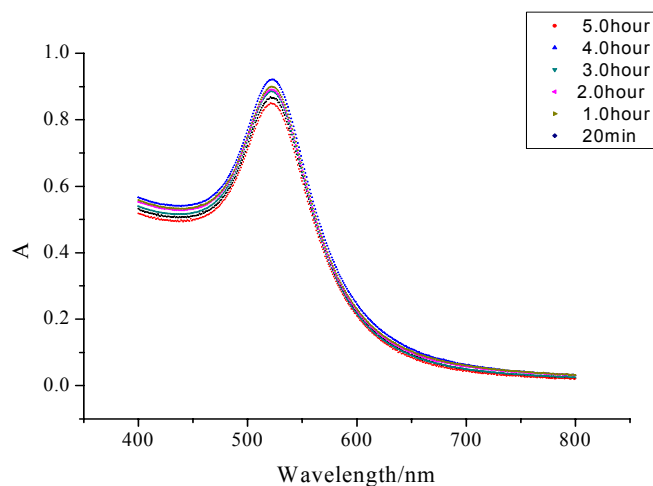

S-Figure-17 Effect of incubation time on the absorption spectra of AuNPs-oligo a  
1.3 $\mu\text{M}$  oligo a, 3.0nM AuNPs, 0.1 M NaCl

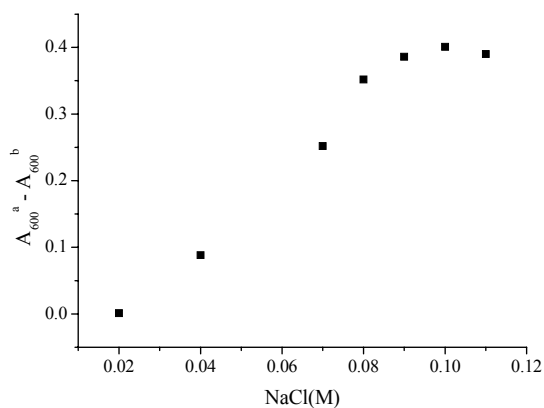

S-Figure-18 Effect of NaCl on the aggregation of AuNPs-oligo a and AuNPS-oligo b.

1.30  $\mu\text{M}$  oligo-a, 1.30  $\mu\text{M}$  oligo-b, 3.0 nM AuNPs, 4.0  $\mu\text{M}$  Ru(bipy)<sub>2</sub>dppz<sup>2+</sup>:

S-Table 2 Analytical parameters for detection intercalators

| Intercalators                            | Linear regression equation(C, $\mu\text{mol/L}$ ) | Linear range ( $\mu\text{mol/L}$ ) | r(Correlation coefficient) | Precision at 0.5 $\mu\text{mol/L}$ (RSD, %) |
|------------------------------------------|---------------------------------------------------|------------------------------------|----------------------------|---------------------------------------------|
| EB                                       | $A=0.181+0.0477C$                                 | 2.0-7.0                            | 0.9969                     | 2.86                                        |
| Ru(bipy) <sub>2</sub> dppz <sup>2+</sup> | $A=0.193+0.127C$                                  | 0.5-3.5                            | 0.9973                     | 3.55                                        |
| Ru(phen) <sub>2</sub> dppz <sup>2+</sup> | $A=0.078+0.169C$                                  | 1.0-4.0                            | 0.9955                     | 3.34                                        |
| Ru(bipy) <sub>2</sub> dppx <sup>2+</sup> | $A=0.126+0.177C$                                  | 1.0-3.5                            | 0.9958                     | 2.84                                        |

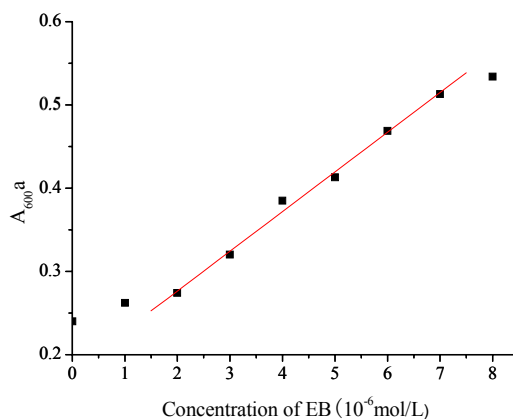

S-Figure 19 Effect of EB concentration on the absorbance of AuNPs-oligo a.

oligo-a: 1.30  $\mu\text{M}$ ; gold nanoparticles:3.0 nM

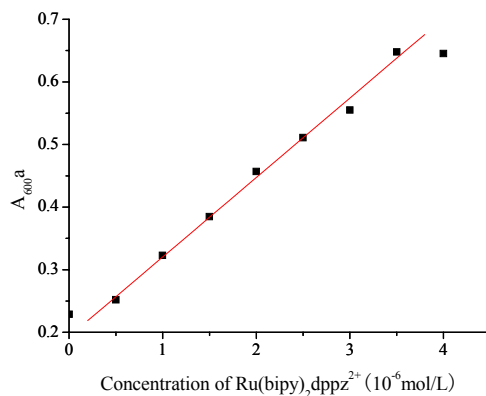

S-Figure 20 Effect of Ru(bipy)<sub>2</sub>dppz<sup>2+</sup> concentration on the absorbance of AuNPs-oligo a.

oligo-a: 1.30 μM; gold nanoparticles:3.0 nM

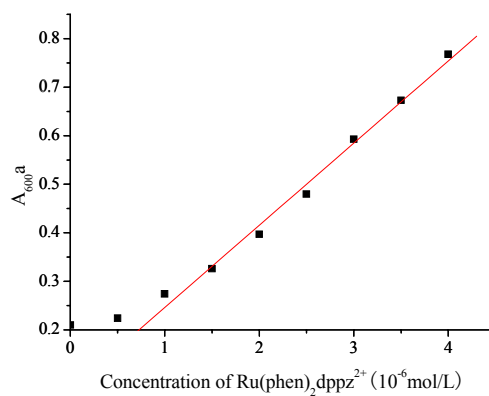

S-Figure 21 Effect of Ru(phen)<sub>2</sub>dppz<sup>2+</sup> concentration on the absorbance of AuNPs-oligo a.

oligo-a: 1.30 μM; gold nanoparticles:3.0 nM

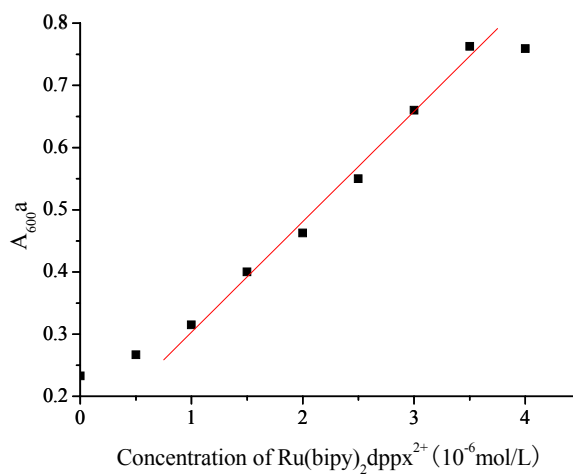

S-Figure 22 Effect of Ru(bipy)<sub>2</sub>dppx<sup>2+</sup> concentration on the absorbance of AuNPs-oligo a.

oligo-a: 1.30 μM; gold nanoparticles:3.0 nM

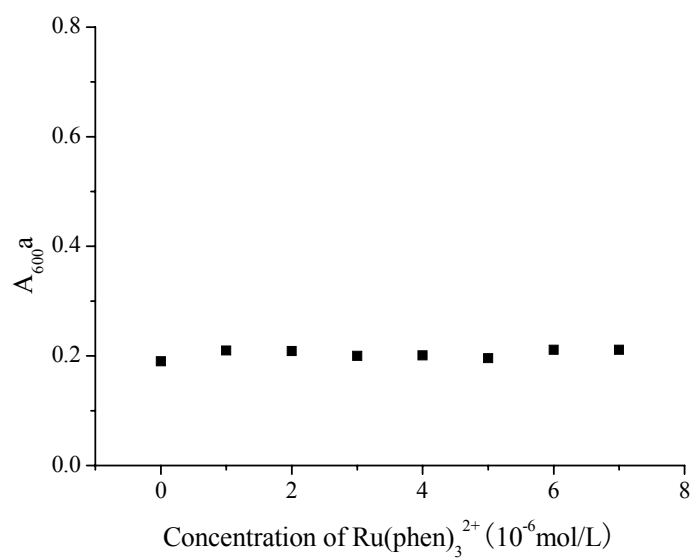

S-Figure 23 Effect of Ru(phen)<sub>3</sub><sup>2+</sup> concentration on the absorbance of AuNPs-oligo a.

oligo-a: 1.30 μM; gold nanoparticles:3.0 nM
